# Supplementary material for: The snails' tale in deep-sea habitats in the Gulf of Cadiz (NE Atlantic)
Source: Copernicus journal article supplement (doi:10.5194/bg-10-5159-2013), 2013-07-30
Supplement: Supplementary file 1 [file bg-10-5159-2013-supplement.pdf]

**Table 1.** Station data for the Gulf of Cadiz samples yielding Gastropoda taxa. Observations from TTR11-TTR17, MSM01-03, 64PE237, 64PE253, 64PE284 and JC10 cruise reports (Akhmetzhanov et al., 2007; 2008; Kenyon et al., 2003; 2006; Pinheiro et al., 2003; Ivanov et al., 2009; de Haas and Mienis, 2005; Weaver et al., 2007). D: dredge; Gr: TV-assisted grab; UB: USNEL box core; MC: Megacore/Multicore; K: Kasten core; BL: Bigo Lander; FL: FLUFO Lander; ROV: Remote operated vehicle. EA: El-Araiche; CP: Carbonate Province; DF: Deep Field.

| Structure                 | Cruise   | Station  | Sampler | Date<br>dd.mm.yy | Latitude (N) | Longitude<br>(W) | Depth<br>(m) | Sample description                              | Substrate |
|---------------------------|----------|----------|---------|------------------|--------------|------------------|--------------|-------------------------------------------------|-----------|
| <b>Mud volcanoes</b>      |          |          |         |                  |              |                  |              |                                                 |           |
| <i>El-Araiche</i>         |          |          |         |                  |              |                  |              |                                                 |           |
| Mercator                  | MSM01-03 | 242      | UB      | 06.05.06         | 35°17.87'    | 06°38.81'        | 350          | Crater; Mud breccia, <i>Hyalonecia</i> facies   | Soft      |
|                           | MSM01-03 | 237.2    | MC      | 06.05.06         | 35°17.91'    | 06°38.69'        | 353          | Crater; Mud breccia                             | Soft      |
|                           | MSM01-03 | 241      | UB      | 06.05.06         | 35°17.92'    | 06°38.72'        | 353          | Crater; Mud breccia, <i>Caryophyllia</i> facies | Soft      |
|                           | TTR15    | AT575    | UB      | 26.07.05         | 35°17.90'    | 06°38.71'        | 355          | Crater; Mud breccia                             | Soft      |
|                           | TTR15    | AT569    | Gr      | 25.07.05         | 35°17.92'    | 06°38.72'        | 358          | Crater; Mud breccia                             | Soft      |
|                           | 64PE253  | M2006_49 | UB      | 14.10.06         | 35°17.90'    | 06°38.64'        | 360          | Crater; Mud breccia and carbonate debris        | Soft      |
|                           | MSM01-03 | 287      | MC      | 11.05.06         | 35°17.89'    | 06°39.06'        | 379          | Crater rim; Mud breccia                         | Soft      |
|                           | TTR15    | AT576    | UB      | 26.07.05         | 35°17.66'    | 06°39.13'        | 428          | Flank; Mud breccia                              | Soft      |
| Fiúza                     | TTR14    | AT566    | Gr      | 09.08.04         | 35°15.51'    | 06°41.70'        | 414          | Crater; Mud breccia and marl                    | Soft      |
| Gemini                    | 64PE253  | M2006_10 | UB      | 07.10.06         | 35°16.83'    | 06°45.76'        | 432          | Crater; Mud breccia                             | Soft      |
|                           | 64PE253  | M2006_08 | UB      | 07.10.06         | 35°16.75'    | 06°45.72'        | 444          | Crater; Mud breccia and carbonate debris        | Soft      |
|                           | 64PE253  | M2006_18 | UB      | 08.10.06         | 35°16.39'    | 06°46.40'        | 608          | Flank; Carbonate debris                         | Soft      |
| Kidd                      | TTR14    | AT528    | Gr      | 03.08.04         | 35°25.30'    | 06°43.97'        | 489          | Crater; Mud breccia, carbonate debris           | Soft      |
|                           | TTR14    | AT560    | UB      | 08.08.04         | 35°25.31'    | 06°43.98'        | 498          | Crater; Mud breccia                             | Soft      |
|                           | TTR14    | AT561    | UB      | 08.08.04         | 35°25.60'    | 06°44.10'        | 526          | Flank; Hemipelagic sediments                    | Soft      |
| <b>Carbonate Province</b> |          |          |         |                  |              |                  |              |                                                 |           |
| Pipoca                    | 64PE284  | 12706-1  | K       | 21.02.08         | 36°26.81'    | 07°12.70'        | 702          | Flank; Mud breccia                              | Soft      |

|                   |                |            |         |            |           |           |           |                                                        |                                                                                 |      |
|-------------------|----------------|------------|---------|------------|-----------|-----------|-----------|--------------------------------------------------------|---------------------------------------------------------------------------------|------|
| Student           | TTR10          | AT239      | Gr      | 22.07.00   | 35°30.85' | 07°08.82' | 955       | Crater; Crusts, carbonates, shell ash and coral debris | Mixed                                                                           |      |
| Darwin            | JC10-D33       | 032-Bibo01 | BC-D33  | 22.05.07   | 35°23.52' | 07°11.51' | 1109      | Crater; shell ash                                      | Mixed                                                                           |      |
|                   | JC10-D41       | 76         | ROV-D41 | 01.06.07   | 35°23.50' | 07°11.50' | 1110      | Crater; Mussel bed                                     | Mixed                                                                           |      |
|                   | TTR16          | AT608      | Gr      | 30.05.06   | 35°23.53' | 07°11.47' | 1115      | Crater; Shell ash, slabs and crusts.                   | Mixed                                                                           |      |
|                   | TTR17          | AT664      | Gr      | 26.06.2008 | 35°23.52' | 07°11.49' | 1128      | Crater; Mussel bed                                     | Mixed                                                                           |      |
| Jesus Baraza      | TTR12          | AT391      | Gr      | 09.07.02   | 35°35.44' | 07°12.26' | 1105      | Crater; Carbonate clay                                 | Mixed                                                                           |      |
| <b>Deep Field</b> |                |            |         |            |           |           |           |                                                        |                                                                                 |      |
| Capitan Arutyunov | MSM01-03       | 212        | BL      | 30.04.06   | 35°39.68' | 07°19.98' | 1317      | Crater center; Mud breccia and clasts                  | Soft                                                                            |      |
|                   | MSM01-03       | 190.2      | MC      | 28.04.06   | 35°39.67' | 07°19.97' | 1320      | Crater center; Mud breccia and clasts                  | Soft                                                                            |      |
|                   | MSM01-03       | 225        | BL      | 04.05.06   | 35°39.70' | 07°20.01' | 1320      | Crater center; Mud breccia and clasts                  | Soft                                                                            |      |
|                   | MSM01-03       | 344        | FL      | 16.05.06   | 35°39.70' | 07°20.04' | 1320      | Crater center; Mud breccia and clasts                  | Soft                                                                            |      |
|                   | MSM01-03       | 218        | UB      | 30.04.06   | 35°39.64' | 07°20.05' | 1321      | Crater center; Gas hydrates present                    | Soft                                                                            |      |
|                   | MSM01-03       | 274        | BL      | 10.05.06   | 35°39.71' | 07°20.00' | 1321      | Crater center; Mud breccia and clasts                  | Soft                                                                            |      |
|                   | MSM01-03       | 190.1      | MC      | 28.04.06   | 35°39.66' | 07°19.97' | 1322      | Crater center; Mud breccia and clasts                  | Soft                                                                            |      |
|                   | MSM01-03       | 180        | UB      | 27.04.06   | 35°39.74' | 07°19.96' | 1323      | Crater rim; Sediment                                   | Soft                                                                            |      |
|                   | TTR14          | AT544      | G       | 06.08.04   | 35°39.71' | 07°19.01' | 1330      | Crater center; Mud breccia and clasts                  | Soft                                                                            |      |
|                   | TTR12          | AT399      | Gr      | 13.07.02   | 35°39.80' | 07°20.00' | 1339      | Crater rim; Mud breccia                                | Soft                                                                            |      |
|                   | TTR14          | AT546      | Gr      | 06.08.04   | 35°39.69' | 07°20.05' | 1345      | Crater center; Mud breccia and clasts                  | Soft                                                                            |      |
|                   | Sagres         | TTR17      | AT667   | Gr         | 27.06.08  | 36°02.20' | 08°05.54' | 1562                                                   | Crater; Mud breccia                                                             | Soft |
|                   | Carlos Ribeiro | JC10       | 54      | MC         | 27.05.07  | 35°47.30' | 08°25.22' | 2179                                                   | Flank; Octocoral garden site NE; Hemipelagic sediments with octocoral fragments | Soft |
| MSM01-03          |                | 169        | MC      | 25.04.06   | 35°47.26' | 08°25.36' | 2199      | Crater center; Mud breccia                             | Soft                                                                            |      |
| Bonjardim         | MSM01-03       | 133        | UB      | 19.04.06   | 35°27.82' | 09°00.13' | 3049      | Crater center; Mud breccia                             | Soft                                                                            |      |
| Porto             | TTR17          | AT687      | Gr      | 01.07.08   | 35°33.77' | 09°30.43' | 3887      | Crater; Mud breccia                                    | Soft                                                                            |      |
|                   | TTR17          | AT683      | Gr      | 01.07.08   | 35°33.75' | 09°30.36' | 3890      | Crater; Mud breccia                                    | Soft                                                                            |      |
|                   | TTR16          | AT622      | Gr      | 03.06.06   | 35°33.77' | 09°30.42' | 3902      | Crater; Mud breccia                                    | Soft                                                                            |      |

---

**Adjacent habitats**

|                      |          |            |         |          |           |           |      |                                                          |         |
|----------------------|----------|------------|---------|----------|-----------|-----------|------|----------------------------------------------------------|---------|
| Al-Idrisi            | 64PE253  | M2006_46B  | UB      | 14.10.06 | 35°13.85' | 06°36.59' | 227  | Coral framework                                          | Hard    |
| Mercator             | JC10-D27 | 018-Rock5  | ROV     | 18.05.07 | 35°18.82' | 06°37.15' | 373  | Rock                                                     | Hard    |
|                      | JC10-D27 | 018-Rock3  |         | 18.05.07 | 35°18.84' | 06°37.35' | 426  | Rock                                                     | Hard    |
|                      | JC10-D27 | 018-Rock1  |         | 18.05.07 | 35°18.76' | 06°37.42' | 428  | Rock                                                     | Hard    |
| West of Gibraltar    | TTR14    | AT552      | Gr      | 07.08.04 | 35°42.82' | 06°30.23' | 428  | Carbonate chimneys in brown marl                         | Hard    |
| Vernadsky Ridge      | TTR15    | AT574      | D       | 26.07.05 | 35°02.98' | 06°46.66' | 508  | Carbonate crusts and chimneys                            | Hard    |
| Pen Duick Escarpment | TTR14    | AT565      | Gr      | 09.08.04 | 35°18.18' | 06°47.66' | 544  | Coral debris                                             | Hard    |
|                      | TTR12    | AT406      | Gr      | 15.07.02 | 35°18.15' | 06°47.67' | 550  | Coral framework                                          | Hard    |
|                      | 64PE237  | M2005_30B  | UB      | 01.06.05 | 35°18.75' | 06°47.89' | 550  | Coral framework                                          | Hard    |
|                      | TTR16    | AT600      | Gr      | 28.05.06 | 35°18.78' | 06°48.45' | 610  | Mud breccia covered by coral debris and Carbonate crusts | Mixed   |
|                      | 64PE237  | M2005_28A  | UB      | 31.05.05 | 35°18.20' | 06°48.53' | 622  | Coral framework                                          | Hard    |
| TTR                  | TTR12    | AT416      | Gr      | 17.07.02 | 35°21.87' | 06°52.00' | 695  | Flank; Coral framework                                   | Hard    |
| Meknès               | 64PE284  | 12738-1    | ROV     | 28.02.08 | 34°59.98' | 07°04.51' | 738  | Coral framework                                          | Hard    |
| Ibérico              | TTR11    | AT335      | D       | 25.08.01 | 36°07.40' | 07°41.20' | 905  | Carbonate chimneys                                       | Hard    |
| Guadalquivir Ridge   | TTR11    | AT339      | D       | 26.08.01 | 36°07.59' | 07°46.59' | 1021 | Carbonate chimneys                                       | Hard    |
| Darwin               | JC10-D32 | 028-Rock2  | ROV-D32 | 21.05.07 | 35°23.50' | 07°11.50' | 1118 | Rock                                                     | Hard    |
| Capitan Arutyunov    | MSM01-03 | 195        | Gr      | 28.04.06 | 35°39.27' | 07°20.01' | 1390 | Flank; Coral thicket                                     | Hard    |
| Carlos Ribeiro       | JC10-D36 | 051-Bibo03 | ROV-D36 | 27.05.07 | 35°47.13' | 08°25.34' | 2200 | Wood fall                                                | Organic |

---

---

**In-situ colonization experiments**

|          |         |         |           |          |           |           |      |                   |         |
|----------|---------|---------|-----------|----------|-----------|-----------|------|-------------------|---------|
| Mercator | B09/14  | B09-01  | Chemecoli | 19.05.09 | 35°17.92' | 06°38.71' | 354  | Crater; Wood      | Organic |
|          | B09/14  | B09-01  | Chemecoli | 19.05.09 | 35°17.92' | 06°38.71' | 354  | Crater; Alfafa    | Organic |
|          | 64PE284 | 12750-1 | Chemecoli | 02.03.08 | 35°17.89' | 07°38.71' | 354  | Crater; Wood      | Organic |
|          | 64PE284 | 12752-1 | Chemecoli | 03.03.08 | 35°17.89' | 06°38.71' | 354  | Crater; Alfafa    | Organic |
|          | 64PE284 | 12750-1 | Chemecoli | 02.03.08 | 35°17.89' | 07°38.71' | 354  | Carbonate         | Mixed   |
|          | B09/14b | B09-01  | Chemecoli | 19.05.09 | 35°17.92' | 06°38.71' | 354  | Carbonate         | Mixed   |
| Meknès   | B09/14  | B09-03  | Chemecoli | 20.05.09 | 35°59.09' | 07°04.42' | 698  | Crater; Wood      | Organic |
|          | B09/14  | B09-03  | Chemecoli | 20.05.09 | 35°59.09' | 07°04.42' | 698  | Crater; Alfafa    | Organic |
|          | B09/14  | B09-03  | Chemecoli | 20.05.09 | 35°59.09' | 07°04.42' | 698  | Crater; Carbonate | Mixed   |
| Darwin   | B09/14  | B09-02  | Chemecoli | 19.05.09 | 35°23.52' | 07°11.51' | 1100 | Crater; Wood      | Organic |
|          | B09/14  | B09-02  | Chemecoli | 19.05.09 | 35°23.52' | 07°11.51' | 1100 | Crater; Alfafa    | Organic |
|          | B09/14  | B09-02  | Chemecoli | 19.05.09 | 35°23.52' | 07°11.51' | 1100 | Crater; Carbonate | Mixed   |

---

**Table 2.** Substrate types, distribution patterns and larval development of Gastropoda taxa found in the Gulf of Cadiz. H: Hard substrate; M: Mixed substrate; S: Soft substrate; O: Organic substrate; Sin: Singletons; Rar: Rare species; Mod: Moderate; Abu: Abundant; Ubi: Ubiquitous; P: Planktotrophic; L; Lecithotrophic; N; Non-planktotrophic; U: Unknown. \* Extremely abundant taxa (> 100 individuals) although present only in one substrate type. (i) Larval development inferred from closely related taxa.

| Subclass               | Family                 | Taxa                            | Substrate type |   |   | Chemecoli |     | Distribution | Development | References                  |   |
|------------------------|------------------------|---------------------------------|----------------|---|---|-----------|-----|--------------|-------------|-----------------------------|---|
| Caenogastropoda        | Borsoniidae            | <i>Drilliola loprestiana</i>    | -              | - | S | -         | -   | Sin          | P           | (Bouchet and Warén, 1994)   |   |
|                        | Buccinidae             | <i>Chauvetia balgimae</i>       | -              | - | S | -         | -   | Rar          | N           | (Bouchet and Warén, 1985)   |   |
|                        |                        | <i>Neptunea contraria</i>       | H              | M | - | -         | -   | Mod          | N           | (Bouchet and Warén, 1985)   |   |
|                        |                        | <i>Cerithiopsidae</i> spA       | H              | - | - | -         | -   | Rar          | U           | -                           |   |
|                        | Columbellidae          | <i>Amphissa acutecostata</i>    | H              | M | S | -         | O   | Ubi          | P           | (Bouchet and Warén, 1994)   |   |
|                        | Conoidea               | <i>Conoidea</i> spA             | -              | - | S | -         | -   | Sin          | U           |                             |   |
|                        | Drilliidae             | <i>Spirotropis monterosatoi</i> | -              | - | S | -         | -   | Rar          | N           | Bouchet and Taviani, 1992   |   |
|                        | Epitoniidae            | <i>Claviscala</i> spA           | -              | - | S | -         | -   | Rar          | P           | (Bouchet and Warén, 1986)   |   |
|                        | Eulimidae              | <i>Eulimidae</i> spA            | -              | - | - | -         | H   | O            | Ubi         | U                           | - |
|                        |                        | <i>Fusceulima minuta</i>        | -              | - | S | -         | -   | Sin          | U           | -                           |   |
|                        |                        | <i>Melanella</i> spA            | -              | - | S | -         | -   | Rar          | U           | -                           |   |
|                        | Mangeliidae            | <i>Benthomangelia macra</i>     | -              | - | S | -         | -   | Sin          | P           | (Bouchet and Warén, 1994)   |   |
|                        | Marginellidae          | Marginellidae und.              | -              | - | S | -         | O   | Abu          | N           | (Bouchet and Warén, 1985)   |   |
|                        | Muricidae              | <i>Pagodula echinata</i>        | H              | M | S | -         | H   | Abu          | N           | (i)                         |   |
|                        | Nystiellidae           | <i>Iphitus marshalli</i>        | H              | - | - | -         | -   | Sin          | P           | (Bouchet and Warén, 1986)   |   |
|                        | Raphitomidae           | <i>Gymnobela aquilarum</i>      | -              | - | S | -         | -   | Rar          | P           | (Rex and Warén, 1982)       |   |
|                        |                        | <i>Taranis cf. alexandrina</i>  | -              | M | S | -         | -   | Mod          | N           | (Bouchet and Taviani, 1992) |   |
|                        |                        | <i>Alvania cimicoides</i>       | H              | - | - | -         | O   | Mod          | P           | (Gofas, 2007)               |   |
|                        | Rissoidae              | <i>Alvania electa</i>           | -              | - | S | -         | -   | Rar          | N           | This study                  |   |
|                        |                        | <i>Alvania tomentosa</i>        | H              | - | S | -         | -   | Mod          | N           | This study                  |   |
|                        |                        | <i>Alvania zylensis</i>         | H              | M | - | -         | O   | Ubi          | U           | This study                  |   |
|                        |                        | <i>Obtusella intersecta</i>     | -              | - | S | -         | O   | Abu          | N           | This study                  |   |
|                        |                        | <i>Pseudosetia</i> spA          | -              | M | - | -         | -   | Sin          | P           | This study                  |   |
| <i>Pseudosetia</i> spC |                        | -                               | M              | S | - | -         | Abu | N            | (i)         |                             |   |
|                        | <i>Pseudosetia</i> spD | H                               | -              | S | - | H         | O   | Ubi          | N           | (i)                         |   |

|                   |                    |                                          |   |   |   |   |   |   |      |   |                                       |
|-------------------|--------------------|------------------------------------------|---|---|---|---|---|---|------|---|---------------------------------------|
|                   |                    | <i>Punctulum porcupinae</i>              | - | M | S | - | H | - | Mod  | N | This study                            |
|                   | Triphoridae        | <i>Strobiliger a brychia</i>             | H | - | - | - | - | - | Rar  | P | (Bouchet and Warén, 1993)             |
| Cocculiniformia   | Cocculinidae       | <i>Coccolpigya</i> spp.                  | - | - | - | - | - | O | Abu* | N | (Dantart and Luque, 1994)             |
|                   |                    | <i>Cocculinidae</i> spA                  | - | - | - | O | - | - | Mod  | N | This study; (Dantart and Luque, 1994) |
|                   |                    | <i>Fedikovella</i> spA                   | - | - | - | O | - | - | Sin  | N | This study; (Dantart and Luque, 1994) |
| Heterobranchia    | Cimidae            | <i>Cima cuteculata</i>                   | - | - | - | - | - | O | Rar  | U | -                                     |
|                   |                    | <i>Graphis gracilis</i>                  | - | M | - | - | - | O | Ubi  | L | -                                     |
|                   | Pyramidellidae     | <i>Odostomia</i> spA                     | - | M | S | - | - | - | Mod  | U | -                                     |
|                   |                    | cf. <i>Odostomia</i> sp.                 | - | - | S | - | - | - | Sin  | U | -                                     |
|                   |                    | <i>Eulimella</i> spA                     | H | - | - | - | - | - | Sin  | P | (Rex and Warén, 1982)                 |
|                   |                    | <i>Pyramidellidae</i> spA                | - | - | S | - | - | - | Sin  | U | -                                     |
|                   |                    | <i>Syrnola</i> spA                       | - | - | S | - | - | - | Sin  | U | -                                     |
|                   |                    | <i>Turbonilla</i> spA                    | H | - | - | - | - | - | Sin  | P | This study                            |
|                   | Xylodisculidae     | <i>Xylodiscula</i> spA                   | - | M | S | - | H | O | Ubi  | N | This study                            |
| Neomphalina       | Melanodrymiidae    | <i>Leptogyra</i> spA                     | - | M | - | - | H | O | Ubi  | L | This study                            |
| Patellogastropoda | Lepetidae          | <i>lothia</i> spA                        | - | M | - | - | - | - | Sin  | N | (Dantart and Luque, 1994)             |
| Vetigastropoda    | Calliotropidae     | <i>Putzeysia</i> cf. <i>wiseri</i>       | H | M | - | - | H | O | Ubi  | L | This study                            |
|                   | Chilodontidae      | <i>Danilia tinei</i>                     | H | - | - | - | - | - | Sin  | L | (i)                                   |
|                   | Colloniidae        | <i>Cantrainea peloritana</i>             | - | M | S | - | - | - | Mod  | L | (i)                                   |
|                   | Fissurellidae      | <i>Emarginula multistriata</i>           | H | - | - | - | - | - | Sin  | L | (i)                                   |
|                   |                    | <i>Fissurisepta</i> cf. <i>granulosa</i> | H | M | - | - | - | - | Mod  | L | (i)                                   |
|                   |                    | <i>Puncturella</i> spA                   | - | - | S | - | - | - | Sin  | L | (i)                                   |
|                   | Lepetellidae       | <i>Lepetella</i> spA                     | H | - | - | - | - | - | Sin  | L | (i)                                   |
|                   | Pseudococculinidae | <i>Copulabyssia</i> spp.                 | - | - | - | - | - | O | Abu* | L | (i)                                   |
|                   | Pyropeltidae       | <i>Pyropelta</i> aff. <i>sibuetae</i>    | - | M | - | - | - | - | Rar  | L | (i)                                   |
|                   | Scissurellidae     | <i>Anatoma</i> spA                       | H | M | - | - | - | - | Mod  | L | (i)                                   |
|                   |                    | <i>Anatoma</i> spB                       | H | - | - | - | - | - | Mod  | L | (i)                                   |
|                   | Seguenziidae       | <i>Akritogyra</i> spA                    | H | - | - | - | - | - | Sin  | L | This study                            |

|                |                        |                                             |   |   |   |   |   |   |     |   |            |
|----------------|------------------------|---------------------------------------------|---|---|---|---|---|---|-----|---|------------|
|                |                        | <i>Lissotesta</i> spA                       | - | - | S | - | - | - | Sin | L | (i)        |
|                |                        | <i>Sahlingia</i> spA                        | - | - | S | - | - | - | Sin | L | This study |
|                |                        | <i>Sahlingia</i> spB                        | - | - | S | - | - | - | Mod | L | This study |
|                |                        | cf. <i>Sahlingia</i> spA                    | - | - | S | - | - | - | Sin | L | This study |
|                |                        | <i>Seguenziidae</i> spA                     | - | - | S | - | - | - | Rar | L | (i)        |
|                | Solariellidae          | <i>Solariella amabilis</i>                  | H | - | - | - | - | - | Sin | L | (i)        |
|                | Turbinidae             | <i>Bathyxylophila</i> spA                   | - | - | - | - | - | O | Mod | L | (i)        |
|                |                        | cf. <i>Lissospira</i>                       | - | - | - | - | - | O | Mod | L | (i)        |
|                |                        | <i>Cirsonella</i> aff. <i>romettensis</i>   | - | M | - | - | H | - | Mod | L | (i)        |
|                |                        | <i>Moelleriopsis</i> cf. <i>messanensis</i> | - | M | - | - | H | O | Ubi | L | This study |
|                |                        | <i>Xyloskenea excavata</i>                  | - | - | - | O | - | - | Sin | L | This study |
| Vetigastropoda | Vetigastropoda fam und | Vetigastropoda spA                          | - | - | S | - | - | - | Mod | U | -          |

## References

Akhmetzhanov, A., Ivanov, M., Kenyon, N., and Mazzini, A.: Deep-water cold seeps, sedimentary environments and ecosystems of the Black and Tyrrhenian Seas and the Gulf of Cadiz. Preliminary results of investigations during the TTR-15 cruise of RV Professor Logachev, June-August, 2005, IOC Tech. S., 72, 99, 2007.

Akhmetzhanov, A., Kenyon, N., Ivanov, M., Westbrook, G., and Mazzini, A.: Deep-water depositional systems and cold seeps of the Western Mediterranean, Gulf of Cadiz and Norwegian continental margins, preliminary results of investigations during the TTR-16 cruise of RV Professor Logachev, May-june, 2006, IOC Tech. S., 76, 91, 2008.

Bouchet, P., and Warén, A.: Revision of the Northeast Atlantic bathyal and abyssal Neogastropoda excluding Turridae (Mollusca, Gastropoda), Bolletino Malacologico, Supplemento 1, 123-296, 1985.

Bouchet, P., and Warén, A.: Revision of the Northeast Atlantic bathyal and abyssal Aclididae, Eulimidae and Epitonidae (Mollusca, Gastropoda), Bolletino Malacologico, Supplemento 2, 300-576, 1986.

Bouchet, P., and Taviani, M.: The Mediterranean deep-sea fauna: pseudopopulations of Atlantic species?, *Deep-Sea Res.*, 39, 169-184, 1992.

Bouchet, P., and Warén, A.: Revision of the Northeast Atlantic bathyal and abyssal Mesogastropoda, *Bolletino Malacologico, Supplemento* 3, 580-840, 1993.

Bouchet, P., and Warén, A.: Ontogenetic migration and dispersal of deep-sea gastropoda larvae, in: *Reproduction, larval biology, and recruitment of the deep-sea benthos*, edited by: Young, C. M., and Eckelbarger, K. J., Columbia University Press, New York, 98-117, 1994.  
Dantart, L., and Luque, A.: Cocculiniformia and Lepetidae (Gastropoda: Archaeogastropoda) from Iberian waters, *J. Mollus. Stud.*, 60, 277-313, 1994.

de Haas, H., and Mienis, F.: Cruise Report R.V. Pelagia Cruise M2005 (64PE237): Cold Water Corals and Carbonate Mound Formation at the Pen Duick Escarpment (Gulf of Cadiz) and Rockall Bank : 19 May - 8 June (Leg 1, Lisbon - Galway), 9 June - 19 June 2005 (Leg 2, Galway - Galway), Royal NIOZ, 2005.

Ivanov, M., Kenyon, N., Comas, M., Pinheiro, L., and Laberg, J.: Introduction to the TTR-17 results. *Geo-Marine Research on the Mediterranean and European-Atlantic Margins*, International Conference and TTR-17 Post-Cruise Meeting of the Training-through-Research Programme. Granada, Spain, 2009.

Kenyon, N., Ivanov, M., Akhmetzhanov, A., and Akhmanov, G.: Interdisciplinary geoscience research on the north east Atlantic margin, Mediterranean Sea and Mid-Atlantic Ridge. Preliminary results of investigations during the TTR-12 cruise of RV" Professor Logachev", June-August 2002, *IOC Tech. S.*, 67, 145, 2003.

Kenyon, N., Ivanov, M., Akhmetzhanov, A., and Kozlova, E.: Interdisciplinary geoscience studies of the Gulf of Cadiz and Western Mediterranean basins: preliminary results of investigations during the TTR-14 cruise of RV Professor Logachev July-September, 2004, *IOC Tech. S.*, 70, 11, 2006.

Pinheiro, L., Ivanov, M., Sautkin, A., Akhmanov, G., Magalhaes, V., Volkonskaya, A., Monteiro, J., Somoza, L., Gardner, J., and Hamouni, N.: Mud volcanism in the Gulf of Cadiz: results from the TTR-10 cruise, *Mar. Geol.*, 195, 131-151, 2003.



Rex, M. A., and Warén, A.: Planktotrophic development in deep-sea prosobranch snails from the western North Atlantic, *Deep-Sea Res.*, 29, 171-184, 1982.

Weaver, P. P. E., Masson, D. G., and National Oceanography Centre, S.: RRS James Cook Cruise 10, 13 May-07 Jul. 2007. Hotspot Ecosystems in the NE Atlantic, UK Contribution to the HERMES Project: Mud Volcanoes in the Gulf of Cadiz, Submarine Canyons West of Portugal, Submarine Canyons in the Northern Bay of Biscay, National Oceanography Centre, University of Southampton, 2007.
